# Supplementary material
Source: Springer Nature journal article supplement (https://www.springermedizin.de/resource/supplementary/12963_2013_235_MOESM7_ESM.pdf/9572444)

1996

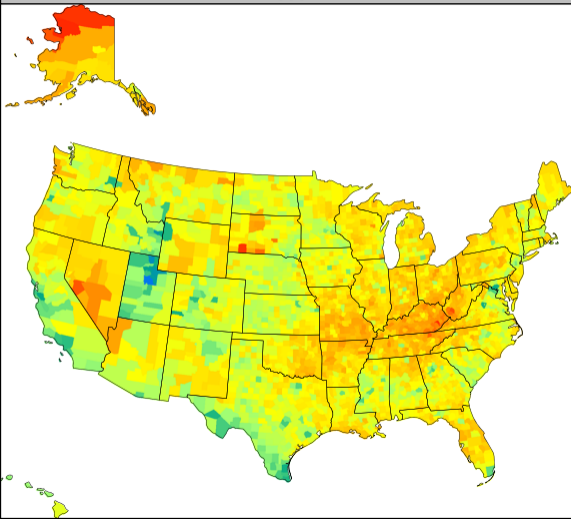

2012

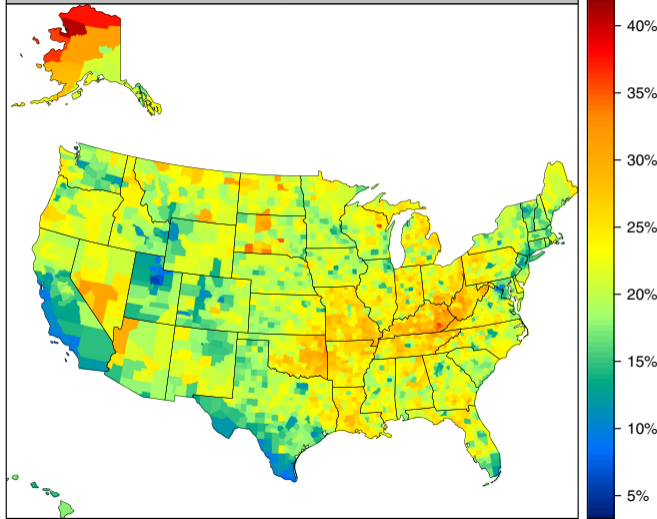

Supplement: MOESM7 [file 9572444]
